# Supplementary material
Source: Springer Nature journal article supplement (https://publikationen.ub.uni-frankfurt.de/files/7207/12943_2009_465_MOESM1_ESM.PDF)
Supplement: MOESM1 [file 12943_2009_465_MOESM1_ESM.PDF]

**Additional file 1.** Most strongly influenced signalling pathways between chemosensitive (UKF-NB-3) and chemoresistant (UKF-NB-3<sup>r</sup>VCR<sup>10</sup>, UKF-NB-3<sup>r</sup>CDDP<sup>1000</sup>) neuroblastoma cells as indicated by PANTHER pathway analysis of gene microarray (AB1700) expression data.

| <b>PANTHER signalling pathway</b>  | <b>p-value</b>                          |
|------------------------------------|-----------------------------------------|
| 1. TGF- $\beta$ signalling pathway | $1.48 \times 10^{-5}$                   |
| 2. p38 MAPK pathway                | $2.59 \times 10^{-5}$                   |
| 3. Ras pathway                     | $1.79 \times 10^{-4}$                   |
| <b>4. Angiogenesis</b>             | <b><math>1.87 \times 10^{-4}</math></b> |
| 5. EGF receptor signaling pathway  | $3.02 \times 10^{-4}$                   |
